# Supplementary material
Source: PubMed Central journal article supplement (PMC3633622)
Supplement: NIHMS449524-supplement-1.pdf [file NIHMS449524-supplement-1.pdf]

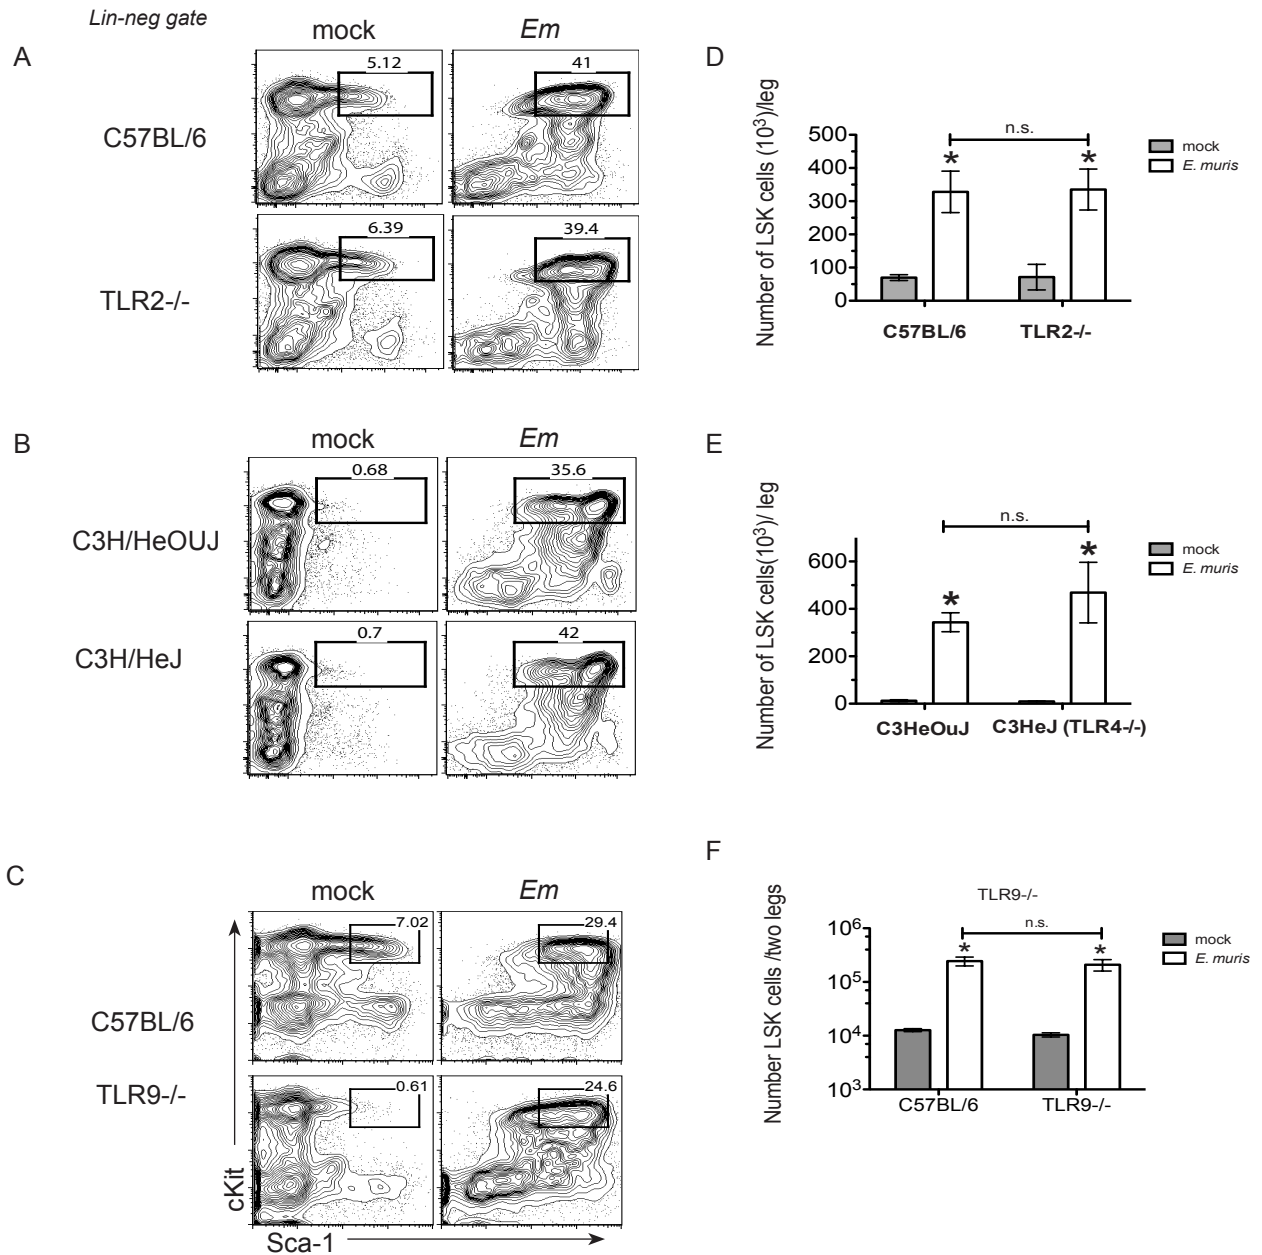

### Supplemental Figure 1. LSK expansion occurs in the absence of TLR2, 4, and 9.

Wildtype and *Tlr*-deficient mice were inoculated with *E. muris*. Bone marrow cells were purified and examined for surface expression of lineage markers, c-Kit, and Sca-1. Lineage-negative cells were analyzed for expression of c-Kit<sup>+</sup>, Sca-1<sup>+</sup>. (A-C) Square gates are drawn on Lin-negative cells expressing both c-Kit and Sca-1 (LSK) in mock-infected (left column) and *E. muris*-infected (right column) mice on day 11 post-infection in Tlr-deficient or control mice, as indicated. Numbers above the LSK gate represent the frequency of c-Kit<sup>+</sup> Sca-1<sup>+</sup> cells among total Lin-negative cells. (D-F) Numbers of LSK cells the bone marrow is shown for mock- (gray bars) and *E. muris*-infected (open bars) mice. The data represent the mean and standard error of the data. At least four mice are examined for each group. The asterisks reflect significant differences between mock and infected groups and # reflect differences between different strains of mice; \* or #  $p < 0.05$ .

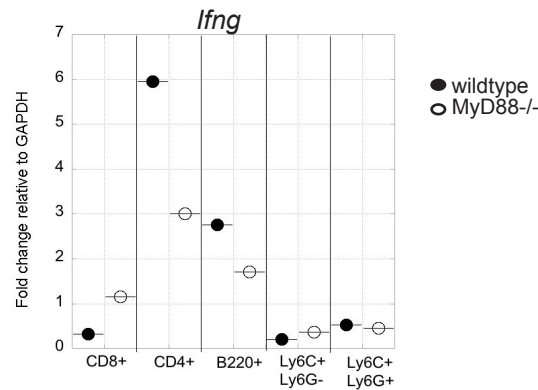

**Supplemental Figure 2. *Ifng* expression in MyD88-deficient and wildtype bone marrow-derived cell populations.** Cell populations were purified by flow cytometric sorting from the bone marrow of mock-infected and *E. muris*-infected wildtype and MyD88-deficient mice. RNA was extracted and real time PCR was performed to determine the relative gene expression of *Ifng*. Data represents the fold change between mock and infected samples, relative to *Gapdh* expression. Closed circles represent cells from wildtype mice and open circles from MyD88-deficient mice.

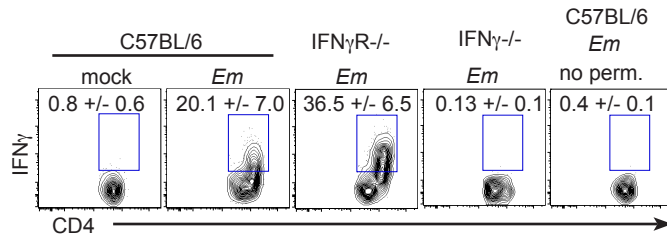

**Supplemental Figure 3. Detection of *in vivo* production of IFN $\gamma$ .** Bone marrow of wild type, IFN $\gamma$ -deficient and IFN $\gamma$ R-deficient mice was analyzed for populations producing IFN $\gamma$  in response to mock or *E. muris* infection (day 11 post-infection). Mice that lacked the *Ifngr* gene exhibited increased IFN $\gamma$  production, relative to infected wildtype mice. Cells that were not permabialized exhibited little IFN $\gamma$  staining.

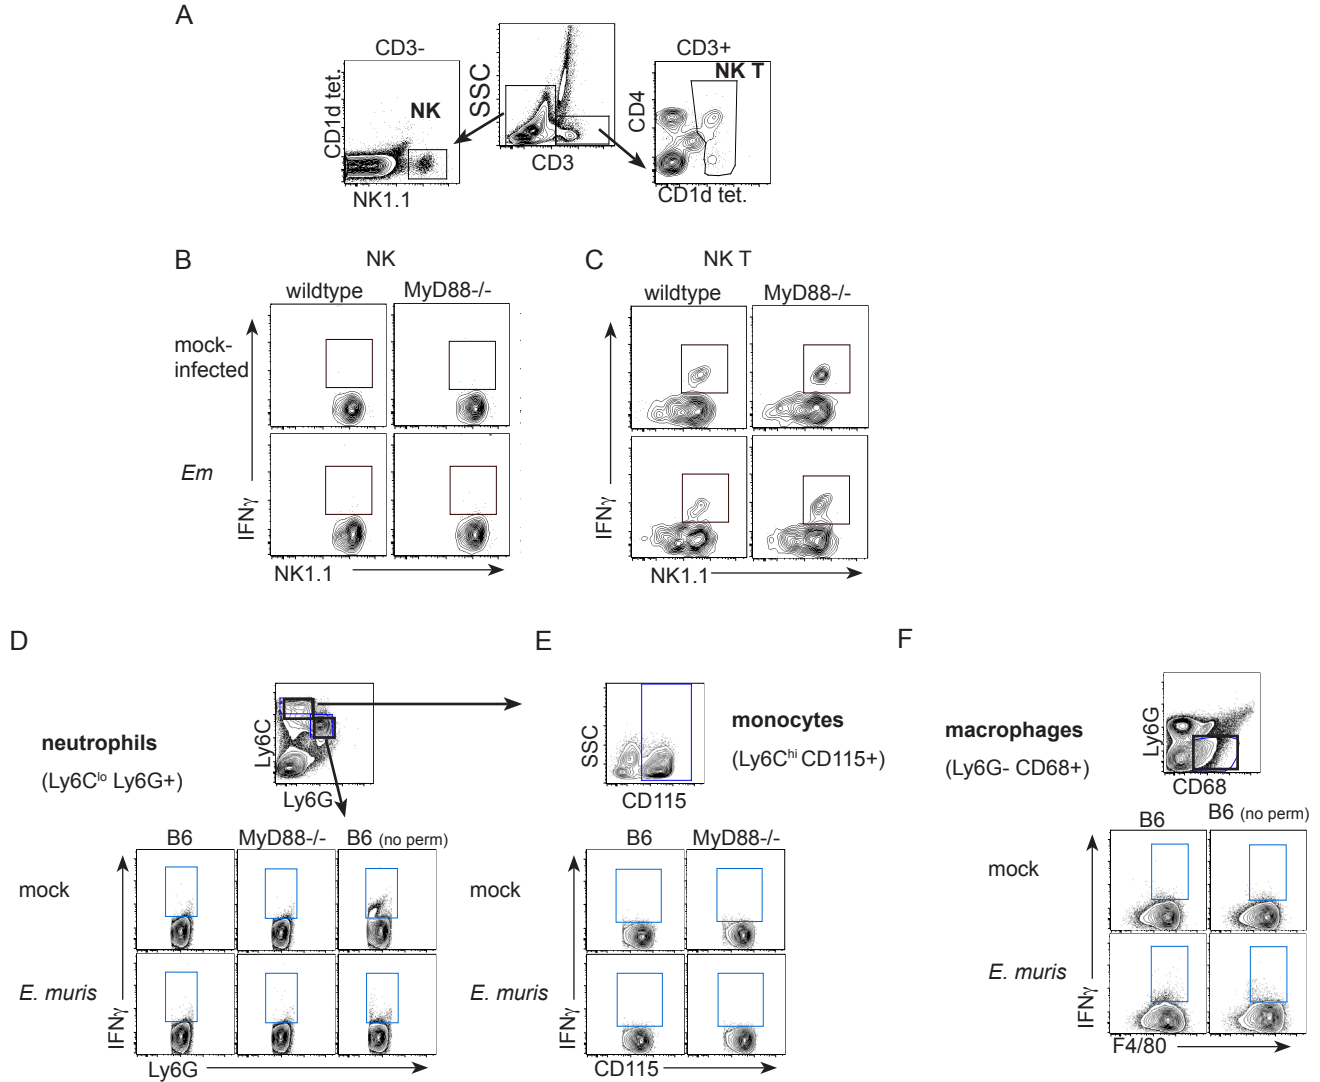

**Supplemental Figure 4. NK, NK T, and myeloid cells are not major producers of IFN $\gamma$  during ehrlichial infection.** Bone marrow was isolated from mock and *E. muris* infected mice and surface stained for NK, NK T, and myeloid populations. ICCS was performed directly ex vivo. Bone marrow cells were harvested from mock and *E. muris*-infected C57BL/6 and MyD88-deficient mice on day 11 post-infection. **(A)** Schematic for gating NK and NK T cells is shown. NK cells were identified as CD3- NK1.1<sup>+</sup> cells and NK T cells were identified by expression of CD3+ CD1d tetramer<sup>+</sup>. Representative flow cytometric plots of IFN expression among NK1.1<sup>+</sup> NK cells **(B)** and NK T cells **(C)**. Numbers above the gated region represent the average frequency and standard deviation of IFN $\gamma$ <sup>+</sup> cells among the population. **(D)** Ly6C<sup>lo</sup> Ly6G<sup>+</sup> cells were identified as neutrophils and analyzed for intracellular IFN $\gamma$  using flow cytometry. Control samples were not permeabilized to detect surface-bound IFN $\gamma$ . **(E)** Ly6C<sup>+</sup> cells were further analyzed for expression of CD115 and intracellular IFN $\gamma$  to identify IFN $\gamma$ -producing monocytes. **(F)** Ly6G<sup>-</sup> CD68<sup>+</sup> cells were further analyzed for F4/80 and IFN $\gamma$  to identify IFN $\gamma$  producing macrophages. At least four independent mice were analyzed for mock and infected groups.
